# Supplementary material for: Photoinduced two-step energy transfer in a Re/Ru dinuclear complex as mediated by an interposed ‘reservoir’ unit
Source: Royal Society of Chemistry journal article supplement (doi:10.1039/b008152n), 2001-01-01
Supplement: b008152n.doc [file b008152n.doc]

**Electronic Supplementary Information**

*Syntheses*: [Ru(bpy)2(dstyb)][PF6]2 (**Ru**–**L**) was prepared by reaction of [Ru(bpy)2Cl2]•2H2O (0.057 g, 0.11 mmol) with an excess of dstyb (0.100 g, 0.21 mmol) in EtOH at reflux for 2 h, followed by precipitation with aqueous NH4PF6 and filtration. Purification by column chromatography on alumina with MeCN–toluene (initially 1:2 v/v, slowly changing to 3:2 v/v) afforded pure Ru–L in 20% yield. ESMS: *m/z* 1024 (M – PF6)+, 439.5 (M – 2PF6)2+.

[ReCl(CO)3–L–Ru(bpy)2][PF6]2 (**Re**–**L**–**Ru**) was prepared by reaction of Ru–L (0.036 g, 0.07 mmol) with Re(CO)5Cl (0.025 g, 0.07 mmol) in EtOH at reflux for 2 h. After precipitation with an excess aqueous NH4PF6 the material was extracted into CH2Cl2, which was dried over MgSO4 and evaporated. Chromatographic purification on alumina with MeCN–toluene (3:2, v/v) afforded pure Re–L–Ru in 30% yield. ESMS: *m/z* 1331 (M – PF6)+, 592 (M – 2PF6)2+. Satisfactory analytical data were obtained for the complexes.

Absorption, luminescence and excitation spectra of 2 x 10–5 M DMF–CH2Cl2 (9:1 v/v) solutions were recorded with a Perkin Elmer Lambda 5 spectrophotometer and with a Spex Fluorolog II spectrofluorimeter (**exc = 372 nm), respectively. Uncorrected luminescence band maxima (uncertainty 2 nm) are used throughout the text. Luminescence quantum yields (**, uncertainty 20%) were determined from corrected spectra. Luminescence lifetimes (**, uncertainty 8%) were obtained with an IBH single-photon counting instrument.
